# Supplementary material for: Single-molecule identification via electric current noise
Source: PubMed Central journal article supplement — Nat Commun. 2010 Dec 14;1:138–. doi: 10.1038/ncomms1141 (PMC3105297; doi:10.1038/ncomms1141), 2010-12-14
Supplement: ncomms1141-s1.pdf [file ncomms1141-s1.pdf]

## **Supplementary information for**

### **Single molecule identification via electric current noise**

Makusu Tsutsui, Masateru Taniguchi & Tomoji Kawai

The Supplementary Information includes:

1. Supplementary Figures S1-S4
2. Supplementary References

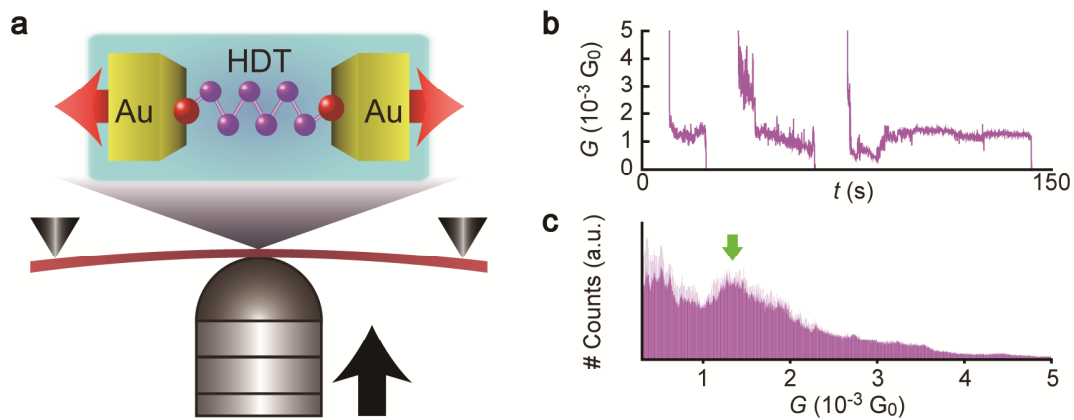

**Supplementary Figure S1. Repeated formation and breaking of Au-1,6-hexanedithiol (HDT)-Au structures using a break junction method at room temperatures implemented prior to the sample cooling to 4 K. (a)** A schematic illustration of MCBJ set up. In experiments, Au junction was opened/closed cyclically through controlling the substrate bending at the junction stretching speed  $v_d = 6$  pm/s at room temperatures in a vacuum. **(b)** Conductance traces during stretching of junctions at  $v_d = 6$  pm/s at room temperatures. Plateaus were often observed at  $G \sim 10^{-3} G_0$  signifying formation of Au-HDT-Au single molecule bridges. **(c)** The corresponding histogram constructed with 150  $G-t$  traces without any data selection reveals a peak at  $G \sim 1.3 \times 10^{-3} G_0$  (green arrow).

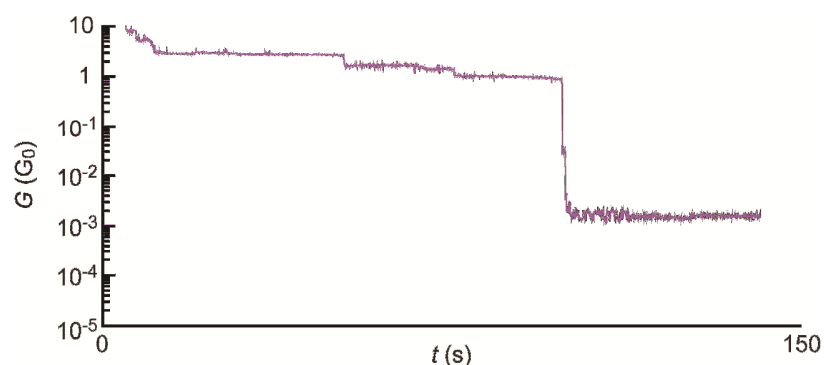

**Supplementary Figure S2.  $G$ - $t$  curve during formation of a HDT single molecule bridge at 4 K.** When a temperature was stabilized at 4 K, we created a HDT single molecule bridge using a self-breaking method<sup>41,42</sup>. In this method, a fused Au contact is stretched at a programmed speed until the junction conductance declines to below  $5 G_0$ . Thereafter, the junction is stretched at  $v_d = 6$  pm/s so as to gently rupture Au contact and form a stable molecular junction. The  $G$ - $t$  curve exhibited a flat plateau at  $1 G_0$  and a subsequent conductance drop to  $G \sim 1.3$  m $G_0$ . The conductance drop at  $1 G_0$  denotes breaking of a Au single-atom chain possessing a fully opened channel for electron transmission<sup>43</sup>, whereas the conductance plateau at  $G < 1 G_0$  can be considered as signifying formation of a molecular bridge between the nano-MCBI electrodes<sup>44</sup>. It is noticeable that  $G \sim 1.3$  m $G_0$  is representative of conductance states of Au-HDT-Au single molecule bridges with hollow-hollow geometries at the metal-molecule linkages as reported previously<sup>45-47</sup>. Therefore, we could attribute the conductance plateau at  $G \sim 1.3$  m $G_0$  to trapping of a single HDT molecule between two Au probes.

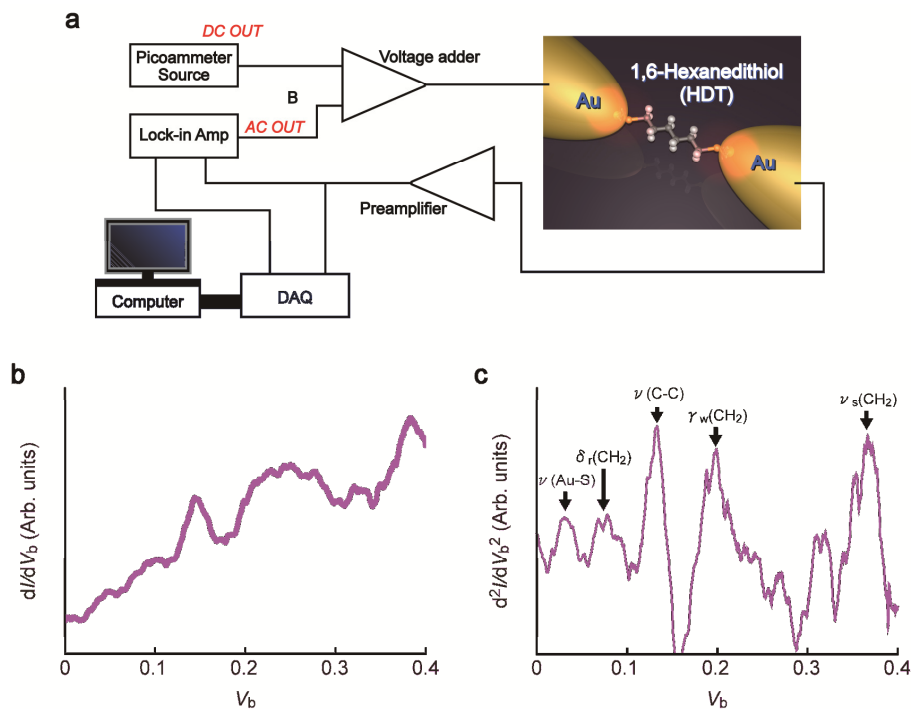

**Supplementary Figure S3. Inelastic electron tunnelling spectroscopy (IETS) performed on a single HDT molecule at 4 K. (a)** A measurement scheme based on a lock-in method used to acquire a single molecule IET spectrum. **(b)** Plots of differential conductance of a HDT single-molecule junction formed at 4 K as a function of bias voltage  $V_b$ . We observed a stepwise increase in  $dI/dV_b$  that signify contributions of inelastic channels to electron transmission through a HDT molecule at a characteristic bias voltage  $V_p = \hbar\omega_p/e$ , where  $\hbar\omega_p$  and  $e$  are the molecular vibration energy of the IETS-active modes and the electron charge, respectively. **(c)** An IET spectrum obtained numerically from the  $dI/dV_b$ - $V_b$  curve in **(b)**. Pronounced peaks are observed corresponding to the  $dI/dV_b$  steps in **(b)**. The peaks marked by arrows can all be assigned to the IETS-active molecular vibrational modes: The peak at  $V_p = 32$  mV can be assigned to  $\nu(\text{Au-S})$  of a metal-molecule link, while the others at  $V_p = 70$  mV, 133 mV, 198 mV, and 368 mV are attributable to  $\delta_r(\text{CH}_2)$ ,  $\nu(\text{C-C})$ ,  $\gamma_w(\text{CH}_2)$ , and  $\nu_s(\text{CH}_2)$  of an alkyl chain, in accordance to previous works<sup>47-50</sup>. This spectrum may thus be interpreted as a vibrational fingerprint for HDT molecules.

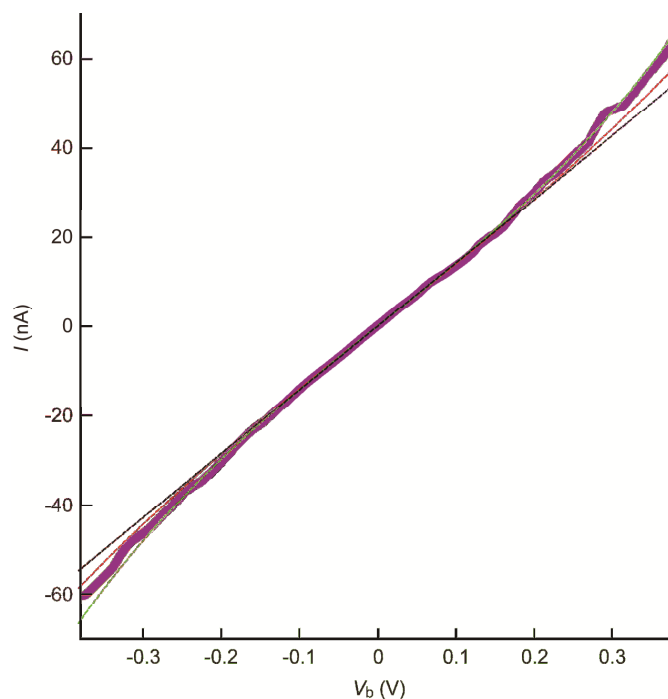

**Supplementary Figure S4. Fitting of the average current versus bias voltage ( $\langle I \rangle - V_b$ ) curve obtained for a HDT single-molecule junction.** Simmon's model has been employed to fit the  $\langle I \rangle - V_b$  plots shown in Fig. 2a of the main text, which describes exponential dependence of current flowing through a double-barrier tunnelling system on the tunnelling barrier height  $\Phi_B$  and width  $L$ <sup>45, 51-53</sup>. We fitted by using  $\gamma$  and  $\Phi_B$  as fitting parameters under an empirical criterion of  $\beta = \gamma\Phi_B \approx 0.8 \text{ \AA}^{-1}$  from literatures<sup>45,53</sup> (green:  $\gamma = 1.032$ ,  $\Phi_B = 0.6 \text{ eV}$ ; red:  $\gamma = 0.843$ ,  $\Phi_B = 0.9 \text{ eV}$ ;  $\gamma = 0.46$ ,  $\Phi_B = 3.0 \text{ eV}$ ). As we show above, we obtained a linear  $I - V_b$  in case when  $\Phi_B = 3 \text{ eV}$ . This situation corresponds to an alignment of the Au Fermi level to the middle of the HOMO-LUMO gap of a hexanedithiol (HDT) molecule. To fit the plots with the Simmon's model, we find that  $\Phi_B$  has to be lowered to 0.6 eV, the value of which seems to be too low considering the relatively wide HOMO-LUMO gap of HDT molecules (6 eV). These results serve to support the validity of the linear elastic tunnelling contributions assumed in the present study.

## Supplementary References

41. Tsutsui, M., Shoji, K., Taniguchi, M. & Kawai, T. Formation and self-breaking mechanism of stable atom-sized junctions. *Nano Lett.* **8**, 345-349 (2008).
42. Tsutsui, M., Taniguchi, M. & Kawai, T. Atomistic mechanics and formation mechanism of metal-molecule-metal junctions. *Nano Lett.* **9**, 2433-2439 (2009).
43. Agrait, N., Yeyati, A. L. & van Ruitenbeek, J. M. Quantum properties of atomic-sized conductors. *Phys. Rep.* **377**, 81-279 (2003).
44. Xu, B. & Tao, N. J. Measurement of single-molecule resistance by repeated formation of molecular junctions. *Science* **301**, 1221 (2003).
45. Li, X., He, J., Hihath, J., Xu, B., Lindsay, S. M. & Tao, N. J. Conductance of single alkanedithiols: conduction mechanism and effect of molecule-electrode contacts. *J. Am. Chem. Soc.* **128**, 2135-2141 (2006).
46. Fujihira, M., Suzuki, M., Fujii, S. & Nishikawa, A. Contacts through single molecular junction of Au/hexanedithiolate/Au measured by repeated formation of break junction in STM under UHV: Effects of conformational change in an alkane chain from gauche to trans and binding sites of thiolates on gold. *Phys. Chem. Chem. Phys.* **8**, 3876-3884 (2006).
47. Taniguchi, M., Tsutsui, M., Yokota, K. & Kawai, T. Mechanically-controllable single molecule switch based on configuration specific electrical conductivity of metal-molecule-metal junctions. *Chem. Sci.* **1**, 247-253 (2010).

48. Wang, W., Lee, T., Kretzschmar, I. & Reed, M. A. Inelastic electron tunneling spectroscopy of an alkanedithiol self-assembled monolayer. *Nano Lett.* **4**, 643-646 (2004).
49. Okabayashi, N., Konda, Y. & Komeda, T. Inelastic electron tunneling spectroscopy of an alkanethiol self-assembled monolayer using scanning tunneling microscopy. *Phys. Rev. Lett.* **100**, 217801 (2008).
50. Jiang, J., Kula, M., Lu, W. & Luo, Y. First-principle simulations of inelastic electron tunneling spectroscopy of molecular electronic devices. *Nano Lett.* **5**, 1551-1555 (2005).
51. Simmons, J. G. Generalized formula for the electronic tunnel effect between similar electrodes separated by a thin insulating film. *J. Appl. Phys.* **34**, 1793 (1963).
52. Wang, W. Lee, T. & Reed, M. A. Mechanism of electron conduction in self-assembled alkanethiol monolayer devices. *Phys. Rev. B* **68**, 035416 (2003).
53. Tomfohr, J. K. & Sankey, O. F. Complex band structure, decay lengths, and Fermi level alignment in simple molecular electronic systems. *Phys. Rev. B* **65**, 245105 (2002).
